# Supplementary material for: What I see and what I feel: the influence of deceptive visual cues and interoceptive accuracy on affective valence and sense of effort during virtual reality cycling
Source: PeerJ journal article supplement (doi:10.7717/peerj.16095), 2023-10-04
Supplement: Analysis.pdf [file Analysis.pdf]

# Supplementary material

Analysis of affective valence (`affval`) and perceived exertion (`perexe`) outcomes

06 Feb 2023

## Table of contents

|                                               |           |
|-----------------------------------------------|-----------|
| <b>Set up</b>                                 | <b>2</b>  |
| Packages . . . . .                            | 2         |
| Constants . . . . .                           | 3         |
| Functions . . . . .                           | 3         |
| <b>Data</b>                                   | <b>6</b>  |
| Import . . . . .                              | 6         |
| Wrangling . . . . .                           | 6         |
| Model predictions dataset . . . . .           | 7         |
| <b>Modelling</b>                              | <b>8</b>  |
| Outcome: <code>affval</code> . . . . .        | 8         |
| Stepwise selection and final model . . . . .  | 8         |
| Effect size calculations . . . . .            | 11        |
| Model predicted <code>affval</code> . . . . . | 13        |
| Outcome: <code>perexe</code> . . . . .        | 17        |
| Stepwise selection and final model . . . . .  | 17        |
| Effect size calculations . . . . .            | 21        |
| Model predicted <code>perexe</code> . . . . . | 22        |
| <b>R session information</b>                  | <b>25</b> |

## Set up

### Packages

```
suppressPackageStartupMessages(suppressWarnings({  
  
  library("readr")      # read data funcs  
  library("dplyr")      # data manipulation  
  library("tibble")     # improved data frames  
  library("ggplot2")    # plotting  
  library("purrr")      # apply functions over lists/vectors  
  library("forcats")    # handling categorical variables  
  library("tidyr")      # manipulate data to long/short representations  
  
  library("mice")       # missing value utilities  
  library("car")        # regression utilities  
  
  library("lme4")       # linear mixed effects modelling  
  library("merTools")   # allows prediction intervals using merMod objects  
  library("lmerTest")   # step-wise lmer model selection  
  
  library("knitr")      # pretty printing of tables: kable()  
  library("gtsummary")  # print summary tables of regression mods  
  library("lattice")    # diagnostic plots  
  
}))
```

## Constants

```
### plotting characters
# steep x long: "/"
# steep x short: "/"
# less steep x long: "-"
# less steep x short: "\"
plchs <-
  c(
    "yes x long" = "|",
    "yes x short" = "/",
    "no x long" = "-",
    "no x short" = "\"
  )

# plotting colour scheme
col_lohi <-
  c(
    "Lower IAcc" = "darkorange",
    "Higher IAcc" = "purple"
  )
```

## Functions

The below functions make the calculation of Cohen's  $f^2$  effect size statistic on `lme4::lmer()` (merMod class objects) possible. These functions are used later after models are fitted.

```
# effect size (f2), R2 and residual variance functions

get_res_var_lmer <- function(lmer_obj) {
  return(sigma(lmer_obj) ^ 2)
}

get_lmer_r2 <- function(lmer_obj) {

  # residual variance of input model
  v_mod <- get_res_var_lmer(lmer_obj)

  # get formula for null model (intercept and REs only)
  null_form <- formula(lmer_obj, random.only = TRUE)
```

```

# create null model
lmer_obj_null <- update(lmer_obj, null_form)

# res var of null mod
v_null <- get_res_var_lmer(lmer_obj_null)

r2 <- (v_null - v_mod) / v_null

attr(r2, "v_null") <- v_null
attr(r2, "v_mod") <- v_mod

return(r2)
}

rm_terms_lmer <- function(lmer_obj, terms) {

  update_form <- as.formula(paste0("~ . -", paste(terms, collapse = " - ")))
  print(update_form)

  lmer_obj_less_term <- update(lmer_obj, update_form)

  return(lmer_obj_less_term)
}

eff_size_f2 <- function(lmer_obj, terms) {

  r2_full <- get_lmer_r2(lmer_obj)[1]
  r2_less_term <- get_lmer_r2(rm_terms_lmer(lmer_obj, terms))[1]

  f2 <- (r2_full - r2_less_term) / (1 - r2_full)

  return(f2)
}

```

Convenience function for tidy printing of data.

```

# function that replaces repeated values in a vector with empty strings
# as the verbose redundancy is too busy in some cases

```

```
rm_rpts <- function(x) {  
  x <- as.character(x)  
  nx <- length(x)  
  rm_ii <- rep(FALSE, nx)  
  for (i in 2:nx) {  
    if (x[i - 1] == x[i])  
      rm_ii[i] <- TRUE  
  }  
  x[rm_ii] <- ""  
  return(x)  
}
```

## Data

### Import

```
dat_col_spec <-  
  cols(  
    partic = col_integer(),  
    affval = col_integer(),  
    perexe = col_integer(),  
    int_sens = col_double(),  
    block = col_integer(),  
    cond = col_character(),  
    steep = col_character(),  
    dist = col_character()  
  )  
  
# read in dataset  
hill_dat <- read_csv("dat/seefeel-hill-dat.csv", col_types = dat_col_spec)  
  
# have a peak  
hill_dat
```

### Wrangling

```
# make factor variables and default levels  
hill_dat <-  
  hill_dat %>%  
  mutate(  
    cond = factor(cond),  
    cond = relevel(cond, ref = "flat"),  
    steep = factor(steep),  
    steep = relevel(steep, ref = "no"),  
    dist = factor(dist),  
    dist = relevel(dist, ref = "short"),  
    block = factor(block)  
  )  
  
# NAs only present in outcome vars  
# md.pattern(hill_dat, rotate.names = TRUE)
```

```

### centring the int_sens variable for easier interpretation of model intercept terms
# NOTE: want average of average participant values
isc <-
  hill_dat %>%
  group_by(partic) %>%
  summarise(avg_int_sens = mean(int_sens))

# This is the mean ISC over participants
mean_isc <- isc %>% pull(avg_int_sens) %>% mean(.)
sd_isc <- isc %>% pull(avg_int_sens) %>% sd(.)

# now modify the ISC values in the data
hill_dat <-
  hill_dat %>%
  mutate(int_sens = int_sens - mean_isc)

```

## Model predictions dataset

This step creates a dataset for predictions from the models used later on.

```

# create a minimal prediction dataset
pred_dat <-
  hill_dat %>%
  distinct(cond, block) %>%
  # NB: this is the mean ISC as we centred this data previously
  mutate(int_sens = 0, partic = 1L)

pred_dat_isc_plus_sd <-
  pred_dat %>%
  mutate(int_sens = int_sens + sd_isc)

pred_dat_isc_less_sd <-
  pred_dat %>%
  mutate(int_sens = int_sens - sd_isc)

pred_dat <-
  bind_rows(pred_dat_isc_less_sd, pred_dat, pred_dat_isc_plus_sd) %>%
  as.data.frame(.)

```

# Modelling

Outcome: affval

## Stepwise selection and final model

```
hill_dat_affmod <- subset(hill_dat, !is.na(affval))

# largest potential model
m1 <-
  lmer(
    affval ~
      int_sens * (cond + steep + dist + block) +
      (1 | partic),
    data = hill_dat_affmod,
    REML = FALSE
  )
# summary(m1)

# elimination of non-significant effects
# partly thanks to code found at:
# https://www.rdocumentation.org/packages/lmerTest/versions/2.0-36/topics/step
s1 <- step(m1) # consider optional arguments: test = c("none", "Rao", "LRT", "Chisq", "F")

# look at the model reduction
print(s1)
```

Backward reduced random-effect table:

|              | Eliminated | npar | logLik  | AIC    | LRT    | Df | Pr(>Chisq)    |
|--------------|------------|------|---------|--------|--------|----|---------------|
| <none>       |            | 18   | -1307.5 | 2651.0 |        |    |               |
| (1   partic) | 0          | 17   | -1820.1 | 3674.2 | 1025.3 | 1  | < 2.2e-16 *** |

---

Signif. codes: 0 '\*\*\*' 0.001 '\*\*' 0.01 '\*' 0.05 '.' 0.1 ' ' 1

Backward reduced fixed-effect table:

Degrees of freedom method: Satterthwaite

|               | Eliminated | Sum Sq | Mean Sq | NumDF | DenDF  | F value | Pr(>F) |
|---------------|------------|--------|---------|-------|--------|---------|--------|
| int_sens:cond | 1          | 0.4492 | 0.2246  | 2     | 933.00 | 0.2722  | 0.7618 |
| int_sens:dist | 2          | 0.6639 | 0.6639  | 1     | 933.01 | 0.8041  | 0.3701 |



| dist           | 3 | 0.4016  | 0.4016 | 1 | 933.00 | 0.4859  | 0.4859        |
|----------------|---|---------|--------|---|--------|---------|---------------|
| int_sens:steep | 4 | 0.7588  | 0.7588 | 1 | 933.00 | 0.9178  | 0.3383        |
| steep          | 5 | 0.2503  | 0.2503 | 1 | 933.00 | 0.3025  | 0.5825        |
| cond           | 0 | 17.0005 | 8.5002 | 2 | 933.00 | 10.2672 | 3.885e-05 *** |
| int_sens:block | 0 | 25.9216 | 8.6405 | 3 | 933.01 | 10.4367 | 9.309e-07 *** |

---

Signif. codes: 0 '\*\*\*' 0.001 '\*\*' 0.01 '\*' 0.05 '.' 0.1 ' ' 1

Model found:

affval ~ int\_sens + cond + block + (1 | partic) + int\_sens:block

```

# plot of post-hoc analysis of the final model
# plot(s1)

# use REML for final fit... see the following links
# https://stats.stackexchange.com/questions/41123/reml-vs-ml-stepaic
# https://stats.stackexchange.com/questions/116770/reml-or-ml-to-compare-two-mixed-effects
# https://stats.stackexchange.com/questions/414551/forward-selection-with-mixed-model-using
m1_final <-
  lmer(
    affval ~ int_sens + cond + block + int_sens:block +
      (1 | partic),
    data = hill_dat_affmod,
    REML = TRUE
  )
summary(m1_final)

```

Linear mixed model fit by REML. t-tests use Satterthwaite's method [lmerModLmerTest]

Formula: affval ~ int\_sens + cond + block + int\_sens:block + (1 | partic)

Data: hill\_dat\_affmod

REML criterion at convergence: 2628.4

Scaled residuals:

| Min     | 1Q      | Median | 3Q     | Max    |
|---------|---------|--------|--------|--------|
| -4.8486 | -0.4947 | 0.0079 | 0.4971 | 4.3849 |

Random effects:

| Groups | Name | Variance | Std.Dev. |
|--------|------|----------|----------|
|        |      |          |          |

```

partic (Intercept) 2.0548 1.4334
Residual          0.8351 0.9138
Number of obs: 953, groups: partic, 20

```

Fixed effects:

|                 | Estimate | Std. Error | df        | t value | Pr(> t )     |
|-----------------|----------|------------|-----------|---------|--------------|
| (Intercept)     | 9.18774  | 0.32866    | 19.56035  | 27.955  | < 2e-16 ***  |
| int_sens        | -4.09769 | 3.01158    | 18.95131  | -1.361  | 0.189589     |
| cond downhill   | -0.21401 | 0.07242    | 924.99970 | -2.955  | 0.003202 **  |
| cond uphill     | 0.10722  | 0.07260    | 925.00232 | 1.477   | 0.140037     |
| block2          | -0.30735 | 0.08379    | 925.00216 | -3.668  | 0.000258 *** |
| block3          | -0.52714 | 0.08370    | 925.00199 | -6.298  | 4.65e-10 *** |
| block4          | -0.80794 | 0.08397    | 925.00476 | -9.622  | < 2e-16 ***  |
| int_sens:block2 | 1.16392  | 0.77901    | 925.00736 | 1.494   | 0.135488     |
| int_sens:block3 | 3.17178  | 0.77612    | 925.00438 | 4.087   | 4.75e-05 *** |
| int_sens:block4 | 3.83155  | 0.78079    | 925.01026 | 4.907   | 1.09e-06 *** |

---

Signif. codes: 0 '\*\*\*' 0.001 '\*\*' 0.01 '\*' 0.05 '.' 0.1 ' ' 1

Correlation of Fixed Effects:

|               | (Intr) | int_sn | cnddwn | cndphl | block2 | block3 | block4 | int_:2 | int_:3 |
|---------------|--------|--------|--------|--------|--------|--------|--------|--------|--------|
| int_sens      | 0.001  |        |        |        |        |        |        |        |        |
| cond downhill | -0.110 | 0.000  |        |        |        |        |        |        |        |
| cond uphill   | -0.110 | 0.000  | 0.500  |        |        |        |        |        |        |
| block2        | -0.128 | -0.002 | 0.000  | 0.002  |        |        |        |        |        |
| block3        | -0.128 | -0.002 | 0.000  | 0.000  | 0.503  |        |        |        |        |
| block4        | -0.128 | -0.002 | -0.002 | 0.002  | 0.501  | 0.502  |        |        |        |
| int_sens:bl2  | -0.002 | -0.130 | 0.000  | -0.004 | 0.006  | 0.010  | 0.010  |        |        |
| int_sens:bl3  | -0.002 | -0.131 | 0.000  | -0.001 | 0.010  | 0.010  | 0.010  | 0.505  |        |
| int_sens:bl4  | -0.003 | -0.130 | 0.002  | 0.005  | 0.010  | 0.010  | 0.012  | 0.502  | 0.504  |

```

# term significance -- Type III Wald chi-square tests
car::Anova(m1_final, type = "III")

```

Analysis of Deviance Table (Type III Wald chisquare tests)

Response: affval

|             | Chisq    | Df | Pr(>Chisq)    |
|-------------|----------|----|---------------|
| (Intercept) | 781.4956 | 1  | < 2.2e-16 *** |
| int_sens    | 1.8514   | 1  | 0.1736        |
| cond        | 20.3573  | 2  | 3.797e-05 *** |

```

block          99.5601  3  < 2.2e-16 ***
int_sens:block 31.0369  3  8.350e-07 ***
---
Signif. codes:  0 '***' 0.001 '**' 0.01 '*' 0.05 '.' 0.1 ' ' 1

```

```

# prettier printing of regression model
m1_final %>%
  tbl_regression(
    estimate_fun = function(x) sprintf("%2.2f", x),
    pvalue_fun = function(x) sprintf("%1.8f", x)
  ) %>%
  add_global_p(keep = TRUE) %>%
  as_gt(.)

```

| Characteristic   | Beta  | 95% CI <sup>1</sup> | p-value    |
|------------------|-------|---------------------|------------|
| int_sens         | -4.10 | -10.40, 2.21        | 0.17362526 |
| cond             |       |                     | 0.00003797 |
| flat             | —     | —                   |            |
| downhill         | -0.21 | -0.36, -0.07        | 0.00320211 |
| uphill           | 0.11  | -0.04, 0.25         | 0.14003749 |
| block            |       |                     | 0.00000000 |
| 1                | —     | —                   |            |
| 2                | -0.31 | -0.47, -0.14        | 0.00025820 |
| 3                | -0.53 | -0.69, -0.36        | 0.00000000 |
| 4                | -0.81 | -0.97, -0.64        | 0.00000000 |
| int_sens * block |       |                     | 0.00000083 |
| int_sens * 2     | 1.16  | -0.36, 2.69         | 0.13548840 |
| int_sens * 3     | 3.17  | 1.65, 4.69          | 0.00004755 |
| int_sens * 4     | 3.83  | 2.30, 5.36          | 0.00000109 |

<sup>1</sup>CI = Confidence Interval

## Effect size calculations

```

### testing and extracting model elements for f^2 calc
# terms(formula(m1_final, fixed.only = TRUE))
# summary(m1_final)
# summary(rm_terms_lmer(m1_final, "cond"))
# summary(rm_terms_lmer(m1_final, c("int_sens", "int_sens:block")))

```

```
### test functions
# get_lmer_r2(m1_final)
# get_lmer_r2(rm_terms_lmer(m1_final, "cond"))
### need to consider higher level terms with main effects
# get_lmer_r2(rm_terms_lmer(m1_final, c("int_sens", "int_sens:block")))

# cond eff size
eff_size_f2(m1_final, "cond")
```

```
~. - cond
<environment: 0x000000003006cf70>
```

```
[1] 0.01979127
```

```
(get_lmer_r2(m1_final) -
  get_lmer_r2(rm_terms_lmer(m1_final, c("cond")))) /
  (1 - get_lmer_r2(m1_final)) # manual check
```

```
~. - cond
<environment: 0x0000000026b6c268>
```

```
[1] 0.01979127
attr(,"v_null")
[1] 0.9641614
attr(,"v_mod")
[1] 0.8350603
```

```
# int_sens eff size
eff_size_f2(m1_final, c("int_sens", "int_sens:block"))
```

```
~. - int_sens - int_sens:block
<environment: 0x000000002f9d8770>
```

```
[1] 0.03016223
```

```
(get_lmer_r2(m1_final) -  
  get_lmer_r2(rm_terms_lmer(m1_final, c("int_sens", "int_sens:block")))) /  
  (1 - get_lmer_r2(m1_final)) # manual check
```

```
~. - int_sens - int_sens:block  
<environment: 0x000000002587e0a8>
```

```
[1] 0.03016223  
attr("v_null")  
[1] 0.9641614  
attr("v_mod")  
[1] 0.8350603
```

```
# interaction only eff size  
eff_size_f2(m1_final, "int_sens:block")
```

```
~. - int_sens:block  
<environment: 0x000000002fc19e20>
```

```
[1] 0.03016245
```

```
(get_lmer_r2(m1_final) -  
  get_lmer_r2(rm_terms_lmer(m1_final, "int_sens:block")))) /  
  (1 - get_lmer_r2(m1_final)) # manual check
```

```
~. - int_sens:block  
<environment: 0x0000000025b5be78>
```

```
[1] 0.03016245  
attr("v_null")  
[1] 0.9641614  
attr("v_mod")  
[1] 0.8350603
```

**Model predicted affval**

```

# ?predict.merMod
# ?predict

### usage
# predict(
#   object, newdata = NULL, newparams = NULL,
#   re.form = ~0, # or NULL for no REs
#   random.only = FALSE, terms = NULL,
#   type = c("link", "response"), allow.new.levels = FALSE,
#   na.action = na.pass, ...
# )

# test the above centring claim
# hist(hill_dat$int_sens_cont)

pred_est <-
  predict(
    m1_final,
    newdata = pred_dat,
    re.form = ~0
  )

# see:
# https://cran.r-project.org/web/packages/merTools/vignettes/Using\_predictInterval.html
# ?merTools::predictInterval

pred_ci_est <-
  merTools::predictInterval(
    merMod = m1_final,
    newdata = pred_dat,
    which = c("full", "fixed", "random", "all")[4],
    level = 0.95,
    n.sims = 1000,
    stat = "median",
    type = "linear.prediction",
    include.resid.var = TRUE, # TRUE for including
    # fix.intercept.variance = TRUE
    seed = 1234567890
  ) %>%

```

```

dplyr::filter(effect == "fixed") %>%
  arrange(obs)

pred_dat_aff <-
  bind_cols(pred_dat, tibble(fit_analytic = pred_est), pred_ci_est) %>%
  as_tibble()

# cat("#### Min and max difference between analytic fit and bootstrp median is:\n")
# with(pred_dat_aff, min(fit_analytic - fit))
# with(pred_dat_aff, max(fit_analytic - fit))

# pred_dat_aff %>%
#   dplyr::select(cond, block, int_sens, fit, lwr, upr) %>%
#   kable(., digits = 2)

pred_dat_aff <-
  pred_dat_aff %>%
  mutate(
    ISC_value =
      ifelse(
        int_sens < (0 - sd_isc/2),
        "Lower IAcc", # mean(IAcc) - sd(IAcc)
        ifelse(
          int_sens > (0 + sd_isc/2),
          "Higher IAcc", # mean(IAcc) + sd(IAcc),
          "Mean IAcc" # mean(IAcc)
        )
      ),
    ISC_value = factor(ISC_value),
    ISC_value = relevel(ISC_value, ref = "Lower IAcc"),
    cond = relevel(cond, ref = "downhill")
  )

# change likert scale data recorded as [1, 12] to [-5, 5]
likert_adj <- -6

pred_dat_aff %>%
  dplyr::filter(ISC_value != "Mean IAcc") %>%
  mutate(
    trunc_up = if_else(upr > 11, 11L, as.integer(NA)),

```

```

    upr = if_else(!is.na(trunc_up), 11, upr),
    fit = fit + likert_adj,
    lwr = lwr + likert_adj,
    upr = upr + likert_adj
  ) %>%
  ggplot(data = ., aes(x= factor(cond), y = fit, col = ISC_value, group = ISC_value)) +
  geom_ribbon(aes(ymax = upr, ymin = lwr, fill = ISC_value), alpha = 0.2, colour = NA) +
  geom_point() +
  geom_line() +
  facet_wrap( ~ block, ncol = 4, labeller = label_both) +
  theme_bw() +
  theme(text = element_text(family = "serif"), panel.grid = element_blank()) +
  scale_color_manual(values = col_lohi) +
  scale_fill_manual(values = col_lohi) +
  labs(
    y = "Predicted Affective Valence",
    x = "Condition",
    col = "Interceptive\nAccuracy Value",
    fill = "Interceptive\nAccuracy Value"
  )
)

```

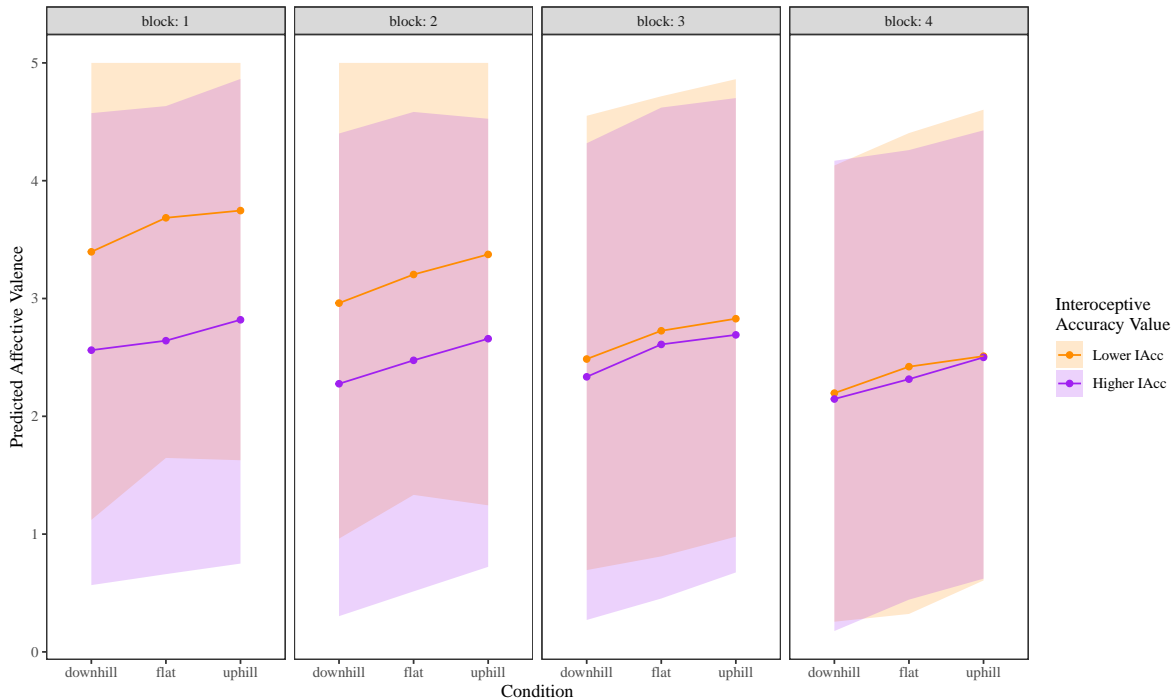



## Outcome: perexe

### Stepwise selection and final model

```
hill_dat_permod <- subset(hill_dat, !is.na(perexe))

# largest potential model
m2 <-
  lmer(
    perexe ~
      int_sens * (cond + steep + dist + block) +
      (1 | partic),
    data = hill_dat_permod,
    REML = FALSE
  )
# summary(m2)

# elimination of non-significant effects
s2 <- step(m2)

# look at the model reduction
print(s2)
```

Backward reduced random-effect table:

|              | Eliminated | npar | logLik  | AIC    | LRT    | Df | Pr(>Chisq)    |
|--------------|------------|------|---------|--------|--------|----|---------------|
| <none>       |            | 18   | -1610.5 | 3257.0 |        |    |               |
| (1   partic) | 0          | 17   | -2048.8 | 4131.6 | 876.65 | 1  | < 2.2e-16 *** |

---  
Signif. codes: 0 '\*\*\*' 0.001 '\*\*' 0.01 '\*' 0.05 '.' 0.1 ' ' 1

Backward reduced fixed-effect table:

Degrees of freedom method: Satterthwaite

|                | Eliminated | Sum Sq | Mean Sq | NumDF | DenDF | F value | Pr(>F)        |
|----------------|------------|--------|---------|-------|-------|---------|---------------|
| int_sens:dist  | 1          | 0.058  | 0.0580  | 1     | 938   | 0.0376  | 0.8462        |
| dist           | 2          | 0.012  | 0.0125  | 1     | 938   | 0.0081  | 0.9282        |
| int_sens:steep | 3          | 0.265  | 0.2645  | 1     | 938   | 0.1718  | 0.6786        |
| steep          | 4          | 0.325  | 0.3250  | 1     | 938   | 0.2110  | 0.6461        |
| int_sens:cond  | 0          | 47.519 | 23.7597 | 2     | 938   | 15.4232 | 2.568e-07 *** |
| int_sens:block | 0          | 54.450 | 18.1501 | 3     | 938   | 11.7818 | 1.400e-07 *** |

---

Signif. codes: 0 '\*\*\*' 0.001 '\*\*' 0.01 '\*' 0.05 '.' 0.1 ' ' 1

Model found:

perexe ~ int\_sens + cond + block + (1 | partic) + int\_sens:cond + int\_sens:block

```
# use REML for final fit
m2_final <-
  lmer(
    perexe ~ int_sens + cond + block +
      int_sens:cond + int_sens:block +
      (1 | partic),
    data = hill_dat_permod,
    REML = TRUE
  )
summary(m2_final)
```

Linear mixed model fit by REML. t-tests use Satterthwaite's method [lmerModLmerTest]

Formula: perexe ~ int\_sens + cond + block + int\_sens:cond + int\_sens:block + (1 | partic)

Data: hill\_dat\_permod

REML criterion at convergence: 3223.2

Scaled residuals:

| Min     | 1Q      | Median  | 3Q     | Max    |
|---------|---------|---------|--------|--------|
| -4.7274 | -0.6103 | -0.0234 | 0.6248 | 2.8202 |

Random effects:

| Groups | Name        | Variance | Std.Dev. |
|--------|-------------|----------|----------|
| partic | (Intercept) | 2.989    | 1.729    |
|        | Residual    | 1.557    | 1.248    |

Number of obs: 958, groups: partic, 20

Fixed effects:

|               | Estimate | Std. Error | df        | t value | Pr(> t )    |
|---------------|----------|------------|-----------|---------|-------------|
| (Intercept)   | 10.44367 | 0.39904    | 19.98855  | 26.172  | < 2e-16 *** |
| int_sens      | -1.82776 | 3.68550    | 19.98716  | -0.496  | 0.6254      |
| cond downhill | 0.25032  | 0.09873    | 927.99928 | 2.535   | 0.0114 *    |
| cond uphill   | -0.19832 | 0.09873    | 927.99933 | -2.009  | 0.0449 *    |

```

block2          0.84316    0.11416 928.00025    7.386 3.37e-13 ***
block3          1.38066    0.11416 928.00025   12.094 < 2e-16 ***
block4          1.71399    0.11416 928.00025   15.014 < 2e-16 ***
int_sens:cond downhill  4.29035    0.91235 927.99966    4.703 2.96e-06 ***
int_sens:cond uphill   4.42798    0.91115 927.99868    4.860 1.38e-06 ***
int_sens:block2     -2.80558    1.05396 927.99999   -2.662 0.0079 **
int_sens:block3     -4.27832    1.05396 927.99999   -4.059 5.34e-05 ***
int_sens:block4     -6.00929    1.05396 927.99999   -5.702 1.59e-08 ***

```

---

Signif. codes: 0 '\*\*\*' 0.001 '\*\*' 0.01 '\*' 0.05 '.' 0.1 ' ' 1

Correlation of Fixed Effects:

```

(Intr) int_sn cnddwn cndphl block2 block3 block4 int_sns:cndd
int_sens      0.000
cond downhill -0.123 0.001
cond uphill   -0.123 0.000 0.499
block2        -0.143 -0.001 -0.002 -0.002
block3        -0.143 -0.001 -0.002 -0.002 0.502
block4        -0.143 -0.001 -0.002 -0.002 0.502 0.502
int_sns:cndd  0.001 -0.123 0.002 0.000 -0.002 -0.002 -0.002
int_sns:cndp  0.000 -0.124 0.000 0.000 0.000 0.000 0.000 0.499
int_sns:bl2   -0.001 -0.143 -0.002 0.000 0.003 0.003 0.003 -0.003
int_sns:bl3   -0.001 -0.143 -0.002 0.000 0.003 0.003 0.003 -0.003
int_sns:bl4   -0.001 -0.143 -0.002 0.000 0.003 0.003 0.003 -0.003
int_sns:cndp  int_:2 int_:3
int_sens
cond downhill
cond uphill
block2
block3
block4
int_sns:cndd
int_sns:cndp
int_sns:bl2   0.000
int_sns:bl3   0.000      0.502
int_sns:bl4   0.000      0.502 0.502

```

```

# term significance
car::Anova(m2_final, type = "III")

```

Analysis of Deviance Table (Type III Wald chisquare tests)

Response: perexe

```
          Chisq Df Pr(>Chisq)
(Intercept)  684.9663  1 < 2.2e-16 ***
int_sens      0.2459  1    0.6199
cond          20.7084  2  3.186e-05 ***
block        257.4023  3 < 2.2e-16 ***
int_sens:cond  30.5175  2  2.362e-07 ***
int_sens:block 34.9684  3  1.237e-07 ***
```

---

Signif. codes: 0 '\*\*\*' 0.001 '\*\*' 0.01 '\*' 0.05 '.' 0.1 ' ' 1

```
# prettier printing of regression model
m2_final %>%
  tbl_regression(
    estimate_fun = function(x) sprintf("%.2f", x),
    pvalue_fun   = function(x) sprintf("%.18f", x)
  ) %>%
  add_global_p(keep = TRUE) %>%
  as_gt(.)
```

| Characteristic      | Beta  | 95% CI <sup>1</sup> | p-value    |
|---------------------|-------|---------------------|------------|
| int_sens            | -1.83 | -9.52, 5.86         | 0.61994148 |
| cond                |       |                     | 0.00003186 |
| flat                | —     | —                   |            |
| downhill            | 0.25  | 0.06, 0.44          | 0.01139471 |
| uphill              | -0.20 | -0.39, -0.00        | 0.04485907 |
| block               |       |                     | 0.00000000 |
| 1                   | —     | —                   |            |
| 2                   | 0.84  | 0.62, 1.07          | 0.00000000 |
| 3                   | 1.38  | 1.16, 1.60          | 0.00000000 |
| 4                   | 1.71  | 1.49, 1.94          | 0.00000000 |
| int_sens * cond     |       |                     | 0.00000024 |
| int_sens * downhill | 4.29  | 2.50, 6.08          | 0.00000296 |
| int_sens * uphill   | 4.43  | 2.64, 6.22          | 0.00000138 |
| int_sens * block    |       |                     | 0.00000012 |
| int_sens * 2        | -2.81 | -4.87, -0.74        | 0.00790347 |
| int_sens * 3        | -4.28 | -6.35, -2.21        | 0.00005337 |
| int_sens * 4        | -6.01 | -8.08, -3.94        | 0.00000002 |

<sup>1</sup>CI = Confidence Interval

## Effect size calculations

```
### testing and extracting model elements for f2 calc
# terms(formula(m2_final, fixed.only = TRUE))
# summary(m2_final)
# summary(rm_terms_lmer(m2_final, c("int_sens", "int_sens:block")))

# interaction int_sens:block only eff size
eff_size_f2(m2_final, "int_sens:cond")
```

```
~. - int_sens:cond
<environment: 0x000000002fae1930>
```

```
[1] 0.03066341
```

```
(get_lmer_r2(m2_final) -
  get_lmer_r2(rm_terms_lmer(m2_final, "int_sens:cond"))) /
  (1 - get_lmer_r2(m2_final)) # manual check
```

```
~. - int_sens:cond
<environment: 0x00000000195754b8>
```

```
[1] 0.03066341
attr("v_null")
[1] 2.112033
attr("v_mod")
[1] 1.557121
```

```
# interaction int_sens:block only eff size
eff_size_f2(m2_final, "int_sens:block")
```

```
~. - int_sens:block
<environment: 0x000000002bcb0c30>
```

```
[1] 0.03433652
```

```
(get_lmer_r2(m2_final) -
  get_lmer_r2(rm_terms_lmer(m2_final, "int_sens:block"))) /
(1 - get_lmer_r2(m2_final)) # manual check
```

```
~. - int_sens:block
<environment: 0x000000002e6003b8>
```

```
[1] 0.03433652
attr(,"v_null")
[1] 2.112033
attr(,"v_mod")
[1] 1.557121
```

### Model predicted perexe

```
# test the above centring claim
# hist(hill_dat$int_sens_cont)

pred_est <-
  predict(
    m2_final,
    newdata = pred_dat,
    re.form = ~0
  )

pred_ci_est <-
  merTools::predictInterval(
    merMod = m2_final,
    newdata = pred_dat,
    which = c("full", "fixed", "random", "all")[4],
    level = 0.95,
    n.sims = 1000,
    stat = "median",
    type = "linear.prediction",
    include.resid.var = TRUE, # TRUE for including
    # fix.intercept.variance = TRUE
    seed = 1234567890
  ) %>%
```

```

dplyr::filter(effect == "fixed") %>%
  arrange(obs)

pred_dat_per <-
  bind_cols(pred_dat, tibble(fit_analytic = pred_est), pred_ci_est) %>%
  as_tibble()

# cat("#### Min and max difference between analytic fit and bootstrp median is:\n")
# with(pred_dat_per, min(fit_analytic - fit))
# with(pred_dat_per, max(fit_analytic - fit))

# pred_dat_per %>%
#   dplyr::select(cond, block, int_sens, fit, lwr, upr) %>%
#   kable(., digits = 2)

pred_dat_per <-
  pred_dat_per %>%
  mutate(
    ISC_value =
      ifelse(
        int_sens < (0 - sd_isc/2),
        "Lower IAcc", # mean(IAcc) - sd(IAcc)
        ifelse(
          int_sens > (0 + sd_isc/2),
          "Higher IAcc", # mean(IAcc) + sd(IAcc),
          "Mean IAcc" # mean(IAcc)
        )
      ),
    ISC_value = factor(ISC_value),
    ISC_value = relevel(ISC_value, ref = "Lower IAcc"),
    cond = relevel(cond, ref = "downhill")
  )

pred_dat_per %>%
  dplyr::filter(ISC_value != "Mean IAcc") %>%
  ggplot(data = ., aes(x= factor(cond), y = fit, col = ISC_value, group = ISC_value)) +
  geom_ribbon(aes(ymax = upr, ymin = lwr, fill = ISC_value), alpha = 0.2, colour = NA) +
  geom_point() +
  geom_line() +
  facet_wrap( ~ block, ncol = 4, labeller = label_both) +

```

```

theme_bw() +
theme(text = element_text(family = "serif"), panel.grid = element_blank()) +
scale_color_manual(values = col_lohi) +
scale_fill_manual(values = col_lohi) +
labs(
  y = "Predicted Ratings of Perceived Exertion",
  x = "Condition",
  col = "Interceptive\nAccuracy Value",
  fill = "Interceptive\nAccuracy Value"
)

```

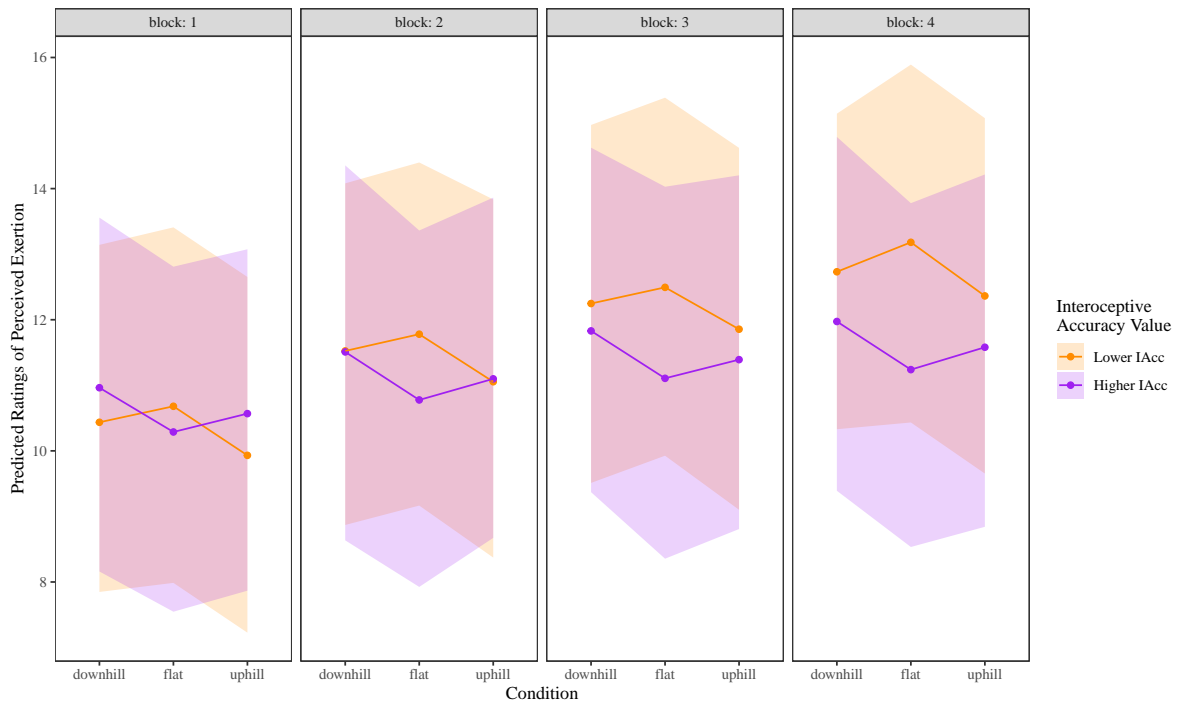



## R session information

```
# for reproducibility  
sessionInfo()
```

```
R version 4.1.3 (2022-03-10)  
Platform: x86_64-w64-mingw32/x64 (64-bit)  
Running under: Windows 10 x64 (build 19044)
```

```
Matrix products: default
```

```
locale:
```

```
[1] LC_COLLATE=English_Australia.1252 LC_CTYPE=English_Australia.1252  
[3] LC_MONETARY=English_Australia.1252 LC_NUMERIC=C  
[5] LC_TIME=English_Australia.1252
```

```
attached base packages:
```

```
[1] stats      graphics  grDevices  utils      datasets  methods   base
```

```
other attached packages:
```

```
[1] lattice_0.20-45 gtsummary_1.6.1 knitr_1.37      lmerTest_3.1-3  
[5] merTools_0.5.2  arm_1.13-1      MASS_7.3-55    lme4_1.1-28  
[9] Matrix_1.5-3    car_3.0-12      carData_3.0-5  mice_3.15.0  
[13] tidyr_1.2.0     forcats_0.5.1  purrr_0.3.4    ggplot2_3.4.0  
[17] tibble_3.1.8    dplyr_1.0.10   readr_2.1.2
```

```
loaded via a namespace (and not attached):
```

```
[1] bit64_4.0.5      vroom_1.5.7      jsonlite_1.8.0  
[4] splines_4.1.3    foreach_1.5.2    shiny_1.7.4  
[7] assertthat_0.2.1 broom.mixed_0.2.9.4 yaml_2.3.5  
[10] globals_0.16.2  numDeriv_2016.8-1.1 pillar_1.8.1  
[13] backports_1.4.1  glue_1.6.2       digest_0.6.29  
[16] promises_1.2.0.1 minqa_1.2.4      colorspace_2.1-0  
[19] htmltools_0.5.4 httpuv_1.6.8     pkgconfig_2.0.3  
[22] labelled_2.9.1   broom_1.0.1      listenv_0.9.0  
[25] haven_2.5.0      xtable_1.8-4     mvtnorm_1.1-3  
[28] scales_1.2.1     later_1.3.0      tzdb_0.2.0  
[31] farver_2.1.1     generics_0.1.3   ellipsis_0.3.2  
[34] withr_2.5.0      furrr_0.3.0      cli_3.6.0  
[37] crayon_1.5.2     magrittr_2.0.2   mime_0.12  
[40] evaluate_0.20    future_1.30.0    fansi_1.0.4
```

|      |                   |                     |                  |
|------|-------------------|---------------------|------------------|
| [43] | parallelly_1.34.0 | broom.helpers_1.8.0 | nlme_3.1-155     |
| [46] | tools_4.1.3       | hms_1.1.1           | lifecycle_1.0.3  |
| [49] | stringr_1.5.0     | munsell_0.5.0       | compiler_4.1.3   |
| [52] | rlang_1.0.6       | blme_1.0-5          | grid_4.1.3       |
| [55] | nloptr_2.0.3      | gt_0.7.0            | iterators_1.0.14 |
| [58] | rstudioapi_0.13   | labeling_0.4.2      | rmarkdown_2.20   |
| [61] | boot_1.3-28       | gtable_0.3.1        | codetools_0.2-18 |
| [64] | abind_1.4-5       | DBI_1.1.2           | R6_2.5.1         |
| [67] | bit_4.0.4         | fastmap_1.1.0       | utf8_1.2.2       |
| [70] | commonmark_1.8.1  | stringi_1.7.12      | parallel_4.1.3   |
| [73] | Rcpp_1.0.10       | vctrs_0.5.2         | tidyselect_1.2.0 |
| [76] | xfun_0.36         | coda_0.19-4         |                  |
